# Supplementary material for: Baseline Alpha-Fetoprotein, Alpha-Fetoprotein-L3, and Des-Gamma-Carboxy Prothrombin Biomarker Status in Bridge to Liver Transplant Outcomes for Hepatocellular Carcinoma
Source: MDPI journal article supplement (doi:10.3390/cancers13194765), 2021-09-23
Supplement: s1 [file s1]

# Baseline Alpha-Fetoprotein, Alpha-Fetoprotein-L3, and Des-Gamma-Carboxy Prothrombin Biomarker Status in Bridge to Liver Transplant Outcomes for Hepatocellular Carcinoma

Kelley G. Núñez <sup>1</sup>, Tyler Sandow <sup>2</sup>, Daniel Fort <sup>3</sup>, Jai Patel <sup>1</sup>, Mina Hibino <sup>1</sup>, Ian Carmody <sup>4</sup>, Ari J. Cohen <sup>1,4,5</sup> and Paul Thevenot <sup>1,\*</sup>

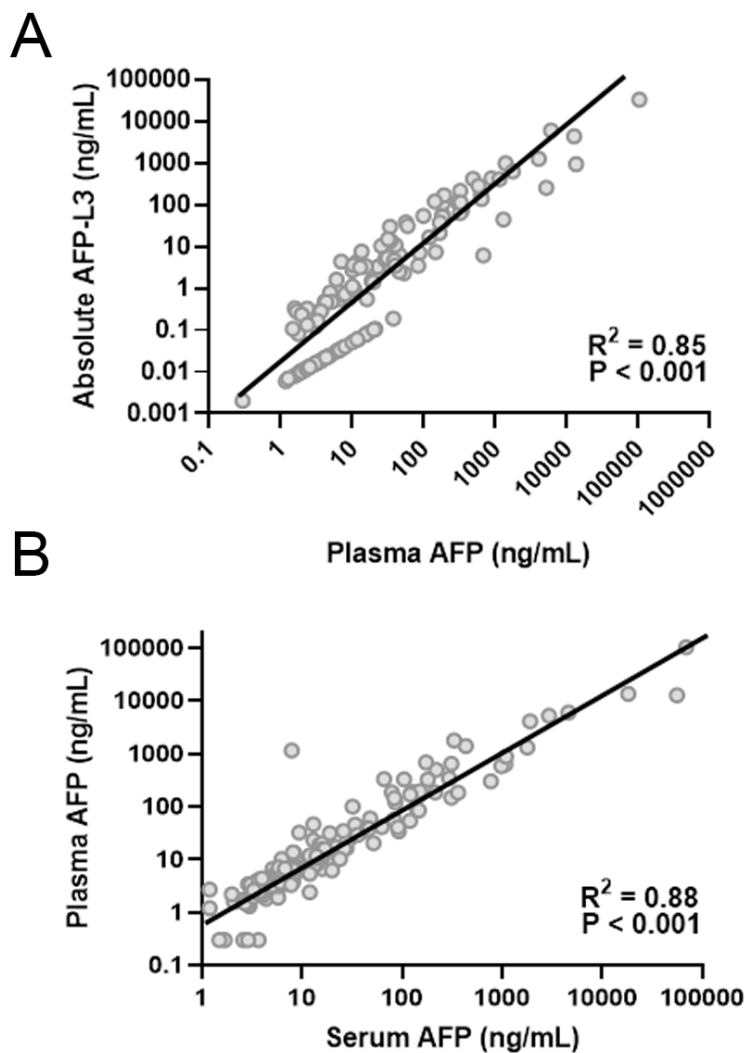

**Figure S1.** Correlations between Absolute AFP-L3 and Plasma AFP and Serum and Plasma AFP Values. **(A)** Absolute AFP-L3 values correlated with plasma AFP determined on the day of liver-directed therapy. **(B)** Serum AFP values determined at the time of hepatocellular carcinoma diagnosis correlated with plasma AFP values assessed on the day of liver-directed therapy.
